# Supplementary material for: Aberrant Mechanical Efficiency during Exercise Relates to Metabolic Health and Exercise Intolerance in Adolescents with Obesity
Source: MDPI journal article supplement (doi:10.3390/ijerph182010578), 2021-10-09
Supplement: s1 [file s1]

# Aberrant Mechanical Efficiency during Exercise Relates to Metabolic Health and Exercise Intolerance in Adolescents with Obesity

Wouter M.A. Franssen, Guy Massa, Bert O. Eijnde, Paul Dendale, Dominique Hansen and Kenneth Verboven

Table S1. Subject characteristics of obese and lean individuals.

| General features              | Obese (n=29) |                         | Lean (n=29)                 |                             | p-value |
|-------------------------------|--------------|-------------------------|-----------------------------|-----------------------------|---------|
|                               | Male (n=15)  | Female (n=14)           | Male (n=16)                 | Female (n=13)               |         |
| Age (years)                   | 13.9 ± 1.0   | 13.7 ± 1.2              | 14.0 ± 1.3                  | 15.1 ± 1.6 <sup>a</sup>     | 0.023   |
| Body weight (kg)              | 91.0 ± 18.0  | 84.9 ± 11.4             | 54.2 ± 12.6 <sup>c,d</sup>  | 55.4 ± 8.6 <sup>a,b</sup>   | <0.001  |
| Body height (cm)              | 169.2 ± 10.3 | 164.0 ± 6.0             | 167.6 ± 9.2                 | 165.9 ± 8.9                 | 0.433   |
| Body height-SDS               | 0.82 ± 1.10  | 0.81 ± 0.89             | 0.61 ± 0.88                 | 0.76 ± 1.19                 | 0.930   |
| BMI (kg/m <sup>2</sup> )      | 31.7 ± 4.9   | 31.5 ± 3.4              | 19.0 ± 2.8 <sup>c,d</sup>   | 20.0 ± 1.8 <sup>a,b</sup>   | <0.001  |
| BMI-SDS                       | 2.14 ± 0.38  | 2.07 ± 0.23             | -0.26 ± 1.02 <sup>c,d</sup> | -0.04 ± 0.57 <sup>a,b</sup> | <0.001  |
| Waist circumference (cm)      | 104.9 ± 13.7 | 101.0 ± 12.0            | 68.1 ± 7.1 <sup>c,d</sup>   | 66.6 ± 4.9 <sup>a,b</sup>   | <0.001  |
| Hip circumference (cm)        | 103.4 ± 9.7  | 104.8 ± 6.5             | 76.0 ± 9.3 <sup>c,d</sup>   | 82.0 ± 5.5 <sup>a,b</sup>   | <0.001  |
| Waist-to-hip ratio            | 1.01 ± 0.05  | 0.96 ± 0.08             | 0.91 ± 0.13 <sup>d,e</sup>  | 0.81 ± 0.04 <sup>a,b</sup>  | <0.001  |
| Body fat (%)                  | 54.1 ± 9.3   | 40.6 ± 7.3 <sup>f</sup> | 15.1 ± 5.9 <sup>c,d</sup>   | 21.5 ± 2.9 <sup>a,b</sup>   | <0.001  |
| Body fat (kg)                 | 50.1 ± 16.5  | 34.8 ± 9.7 <sup>f</sup> | 8.4 ± 4.6 <sup>c,d</sup>    | 12.1 ± 3.0 <sup>a,b</sup>   | <0.001  |
| Fat-free mass (kg)            | 40.9 ± 7.7   | 50.1 ± 7.2 <sup>f</sup> | 45.7 ± 10.0                 | 43.4 ± 6.1                  | 0.023   |
| Systolic BP (mmHg)            | 128 ± 14     | 121 ± 6                 | 115 ± 10 <sup>d</sup>       | 113 ± 10 <sup>b</sup>       | <0.001  |
| Diastolic BP (mmHg)           | 77 ± 9       | 75 ± 10                 | 69 ± 7                      | 70 ± 8                      | 0.069   |
| Mean arterial pressure (mmHg) | 94 ± 9       | 90 ± 7                  | 84 ± 8 <sup>d</sup>         | 85 ± 8 <sup>b</sup>         | 0.003   |
| Development stage             |              |                         |                             |                             | 0.271   |
| Tanner stage 1 (n)            | 3            | 0                       | 1                           | 1                           |         |
| Tanner stage 2 (n)            | 0            | 0                       | 2                           | 0                           |         |
| Tanner stage 3 (n)            | 6            | 2                       | 4                           | 0                           |         |
| Tanner stage 4 (n)            | 2            | 1                       | 6                           | 1                           |         |
| Tanner stage 5 (n)            | 4            | 11                      | 3                           | 11                          |         |

<sup>A</sup>: lean female vs. obese female, <sup>B</sup>: lean female vs. obese male, <sup>C</sup>: lean male vs. obese female, <sup>D</sup>: lean male vs. obese male, <sup>E</sup>: lean male vs. lean female, <sup>F</sup>: obese male vs obese female.

**Table S2.** Biochemical and hormonal parameters in obese and lean adolescents.

| General features                      | Obese (n=29) |               | Lean (n=29)              |                           | p-value |
|---------------------------------------|--------------|---------------|--------------------------|---------------------------|---------|
|                                       | Male (n=15)  | Female (n=14) | Male (n=16)              | Female (n=13)             |         |
| Cardiovascular risk factors           |              |               |                          |                           |         |
| C-reactive protein (mg/l)             | 4.1 ± 6.1    | 4.3 ± 5.5     | 0.3 ± 0.4 <sup>c,d</sup> | 0.6 ± 1.1 <sup>b</sup>    | <0.001  |
| Total cholesterol (mg/dl)             | 147 ± 28     | 169 ± 35      | 150 ± 22                 | 149 ± 27                  | 0.144   |
| LDL cholesterol (mg/dl)               | 87 ± 26      | 101 ± 26      | 77 ± 20                  | 72 ± 24 <sup>a</sup>      | 0.012   |
| HDL cholesterol (mg/dl)               | 43 ± 12      | 47 ± 10       | 59 ± 15 <sup>c,d</sup>   | 63 ± 8 <sup>a,b</sup>     | <0.001  |
| Triglycerides (mg/dl)                 | 103 ± 61     | 102 ± 58      | 72 ± 38                  | 71 ± 31                   | 0.133   |
| Triglyceride-to-HDL cholesterol ratio | 2.6 ± 1.8    | 2.1 ± 0.9     | 1.3 ± 0.9 <sup>d</sup>   | 1.1 ± 0.5 <sup>b</sup>    | 0.003   |
| Uric acid (mg/dl)                     | 5.9 ± 0.8    | 5.4 ± 0.8     | 5.5 ± 1.2 <sup>f</sup>   | 4.5 ± 0.6 <sup>b</sup>    | 0.002   |
| Glycaemic control                     |              |               |                          |                           |         |
| Fasting glucose (mg/dl)               | 91 ± 6       | 87 ± 5        | 85 ± 7                   | 86 ± 6                    | 0.071   |
| Fasting insulin (mU/l)                | 29 ± 19      | 22 ± 12       | 8 ± 4 <sup>c,d</sup>     | 12 ± 6 <sup>b</sup>       | <0.001  |
| Glycated haemoglobin (%)              | 5.3 ± 0.3    | 5.4 ± 0.3     | 5.2 ± 0.3                | 5.2 ± 0.2                 | 0.252   |
| HOMA-IR                               | 6.5 ± 4.4    | 4.8 ± 2.7     | 1.7 ± 0.8 <sup>c,d</sup> | 2.6 ± 1.4 <sup>a,b</sup>  | <0.001  |
| Endocrinology                         |              |               |                          |                           |         |
| Leptin (µg/l)                         | 39.8 ± 19.6  | 54.1 ± 22.5   | 4.2 ± 1.9 <sup>c,d</sup> | 14.2 ± 5.4 <sup>a,b</sup> | <0.001  |

<sup>A</sup>: lean female vs. obese female, <sup>B</sup>: lean female vs. obese male, <sup>C</sup>: lean male vs. obese female, <sup>D</sup>: lean male vs. obese male, <sup>E</sup>: lean male vs. lean female, <sup>F</sup>: obese male vs obese female.

**Table S3.** Cardiopulmonary function in rest, at VT1 and VT2 during cardiopulmonary exercise testing in obese and lean subjects.

|                                              | Obese (n = 29) | Lean (n = 29) | p-value          |
|----------------------------------------------|----------------|---------------|------------------|
| <b>Rest</b>                                  |                |               |                  |
| Oxygen uptake (ml/min)                       | 347 ± 84       | 312 ± 104     | <b>0.036</b>     |
| Oxygen uptake (ml/min/kg)                    | 4.0 ± 0.9      | 5.9 ± 2.0     | <b>&lt;0.001</b> |
| Carbon dioxide output (ml/min)               | 310 ± 80       | 263 ± 90      | <b>0.017</b>     |
| Minute ventilation (l/min)                   | 10 ± 3         | 9 ± 3         | 0.085            |
| Tidal volume (l)                             | 0.64 ± 0.26    | 0.63 ± 0.22   | 0.994            |
| Breathing frequency (breaths/min)            | 17 ± 5         | 16 ± 5        | 0.347            |
| Ventilatory equivalent O <sub>2</sub>        | 30.5 ± 6.5     | 30.1 ± 5.4    | 0.864            |
| Ventilatory equivalent CO <sub>2</sub>       | 33.9 ± 3.7     | 35.5 ± 4.3    | 0.128            |
| Respiratory exchange ratio                   | 0.89 ± 0.11    | 0.85 ± 0.10   | 0.082            |
| Oxygen pulse (ml O <sub>2</sub> /heart beat) | 3.9 ± 1.0      | 4.3 ± 1.7     | 0.203            |
| Heart rate (bpm)                             | 92 ± 12        | 74 ± 13       | <b>&lt;0.001</b> |
| Lipid oxidation (g/min)                      | 0.04 ± 0.05    | 0.07 ± 0.04   | <b>0.033</b>     |
| Carbohydrate oxidation (g/min)               | 0.33 ± 0.16    | 0.19 ± 0.12   | <b>&lt;0.001</b> |
| <b>Ventilatory threshold 1</b>               |                |               |                  |
| Oxygen uptake (ml/min)                       | 1091 ± 185     | 1071 ± 276    | 0.468            |
| Oxygen uptake (ml/min/kg)                    | 12.7 ± 2.5     | 21.6 ± 3.5    | <b>&lt;0.001</b> |
| Carbon dioxide output (ml/min)               | 929 ± 234      | 958 ± 264     | 0.668            |
| Minute ventilation (l/min)                   | 27 ± 6         | 27 ± 6        | 0.975            |
| Tidal volume (l)                             | 1.01 ± 0.24    | 1.01 ± 0.25   | 0.992            |
| Breathing frequency (breaths/min)            | 25 ± 5         | 23 ± 7        | 0.238            |
| Ventilatory equivalent O <sub>2</sub>        | 23.6 ± 3.0     | 23.1 ± 3.4    | 0.516            |
| Ventilatory equivalent CO <sub>2</sub>       | 26.7 ± 2.2     | 26.3 ± 2.7    | 0.523            |
| Respiratory exchange ratio                   | 0.88 ± 0.08    | 0.88 ± 0.09   | 0.726            |
| Oxygen pulse (ml O <sub>2</sub> /heart beat) | 8.0 ± 1.6      | 9.0 ± 2.4     | 0.086            |
| Work rate (W)                                | 64 ± 16        | 77 ± 22       | <b>0.020</b>     |
| Oxygen uptake/Work rate (ml/min/W)           | 16.7 ± 4.1     | 14.5 ± 1.9    | <b>0.009</b>     |
| Heart rate (bpm)                             | 131 ± 12       | 123 ± 11      | <b>0.013</b>     |
| Mechanical efficiency (%)                    | 18.2 ± 2.7     | 20.5 ± 2.8    | <b>0.002</b>     |
| Net mechanical efficiency (%)                | 26.4 ± 5.5     | 29.2 ± 5.3    | 0.052            |
| Lipid oxidation (g/min)                      | 0.21 ± 0.13    | 0.22 ± 0.20   | 0.813            |
| Carbohydrate oxidation (g/min)               | 0.78 ± 0.42    | 0.82 ± 0.55   | 0.732            |
| <b>Ventilatory threshold 2</b>               |                |               |                  |
| Oxygen uptake (ml/min)                       | 1552 ± 358     | 1805 ± 496    | 0.068            |
| Oxygen uptake (ml/min/kg)                    | 18.6 ± 3.7     | 31.8 ± 5.1    | <b>&lt;0.001</b> |
| Carbon dioxide output (ml/min)               | 1824 ± 385     | 1860 ± 463    | 0.751            |
| Minute ventilation (l/min)                   | 51 ± 11        | 51 ± 10       | 0.889            |
| Tidal volume (l)                             | 1.48 ± 0.36    | 1.48 ± 0.37   | 0.996            |
| Breathing frequency (breaths/min)            | 32 ± 7         | 32 ± 7        | 0.885            |
| Ventilatory equivalent O <sub>2</sub>        | 29.4 ± 3.0     | 28.5 ± 3.8    | 0.336            |
| Ventilatory equivalent CO <sub>2</sub>       | 26.7 ± 2.4     | 26.3 ± 2.5    | 0.590            |
| Respiratory exchange ratio                   | 1.10 ± 0.05    | 1.08 ± 0.08   | 0.222            |
| Oxygen pulse (ml O <sub>2</sub> /heart beat) | 13.5 ± 1.3     | 12.5 ± 1.3    | 0.242            |
| Work rate (W)                                | 124 ± 28       | 138 ± 34      | 0.093            |
| Oxygen uptake/Work rate (ml/min/W)           | 16.7 ± 4.1     | 14.5 ± 1.9    | <b>0.009</b>     |
| Heart rate (bpm)                             | 167 ± 12       | 163 ± 14      | 0.244            |
| Mechanical efficiency (%)                    | 21.0 ± 1.9     | 22.7 ± 1.8    | <b>&lt;0.001</b> |
| Net mechanical efficiency (%)                | 26.1 ± 2.8     | 27.7 ± 2.5    | <b>0.032</b>     |
| Lipid oxidation (g/min)                      | 0.00 ± 0.18    | 0.00 ± 0.24   | 0.446            |
| Carbohydrate oxidation (g/min)               | 2.82 ± 0.68    | 3.12 ± 1.01   | 0.192            |

Data are expressed as mean ± SD. Abbreviations: W: Watt, bpm: beats per minute. Comparisons between two groups were performed using the independent-samples t-test or Mann-whitney U test.

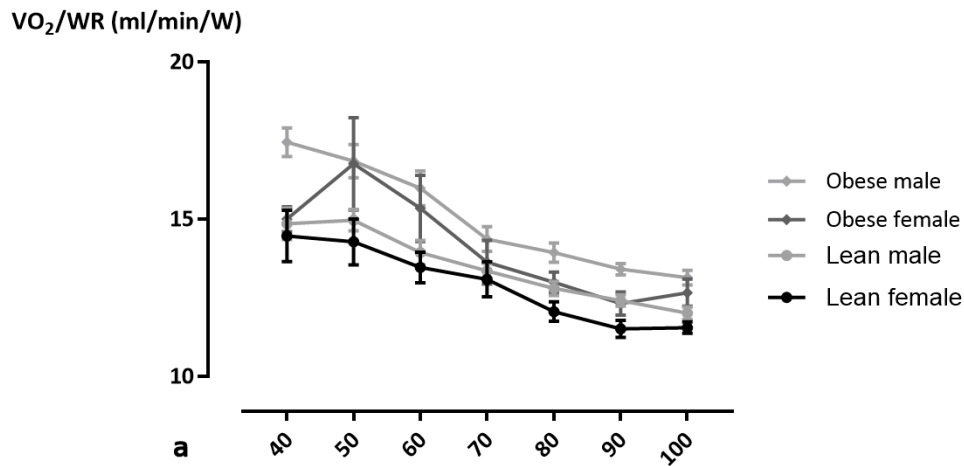

**Figure S1.** Sex differences of the oxygen uptake per work rate in relation to percentage of peak oxygen uptake in lean subjects and subjects with obesity during with maximal exercise testing. Data are presented as mean $\pm$ SEM. Abbreviations:  $VO_2/WR$ : oxygen uptake per work rate, W: Watt.

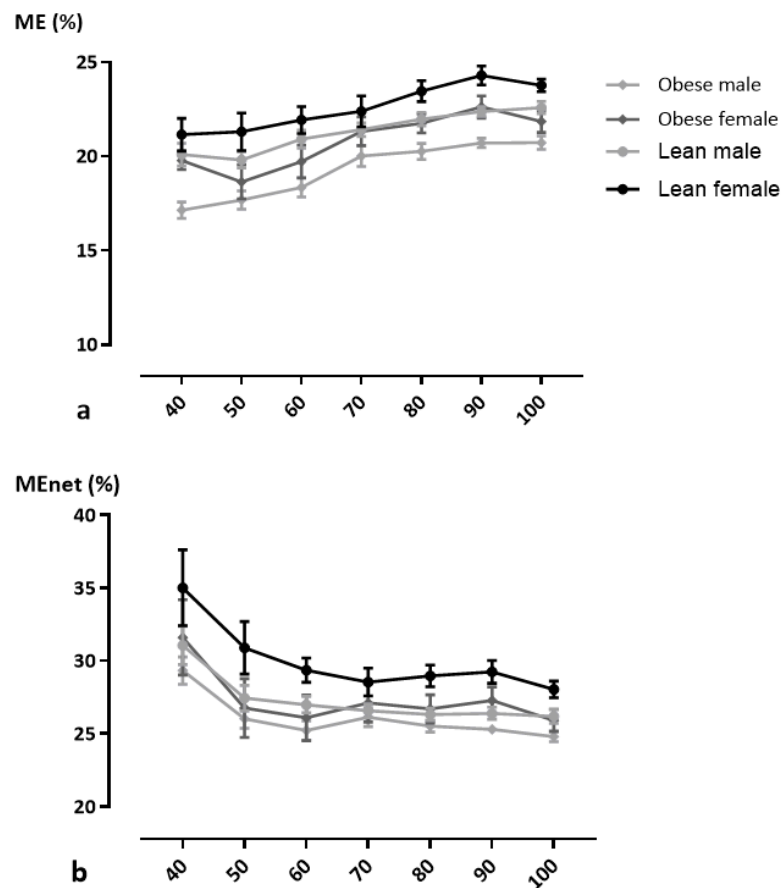

**Figure S2.** Sex differences of the mechanical efficiency (a) and net mechanical efficiency (b) in relation to percentage of peak oxygen uptake in lean subjects and subjects with obesity during maximal exercise testing. Data are presented as mean $\pm$ SEM. Abbreviations: ME: mechanical efficiency, MEnet: net mechanical efficiency.
